# Supplementary material
Source: PubMed Central journal article supplement (PMC2863447)
Supplement: supp_76_9_2799__1.pdf [file supp_76_9_2799__1.pdf]

Table S1. Serotypes of isolates from poultry and pig farms. (available as Supplementary data at AEM Online)

| ESBL type | Number of isolates | Serotypes (number of isolates) <sup>a,b,c</sup>                                                                                                                                                                                                        |
|-----------|--------------------|--------------------------------------------------------------------------------------------------------------------------------------------------------------------------------------------------------------------------------------------------------|
| CTX-M-1   | 22                 | <b>O2:HNM</b> (1), O8:H23 (1), O8:HNM (2), O9:HNM (1), O10:HNM (1), <b>O15:H1</b> (1), O16:HNM (1), O18:HNM (1), O20:HNM (2), O21:HNM (1), <b>O25a:H4</b> (1), O34:H19 (1), O64:H20 (1) <sup>c</sup> , O66:HNM (1), O150:H4 (1), ONT:HNM (5)           |
| CTX-M-9   | 10                 | O11:H4 (1) <sup>c</sup> , O11:H51 (1), <b>O25b:H4</b> (1), O26:HNM (1), O108:HNM (1), O112:H21 (2), ONT:H42 (1), ONT:H51 (2)                                                                                                                           |
| CTX-M-14  | 28                 | O8:H51 (2), O25:H21 (1), O29:HNT (3), O36:H51 (1), O40:H45 (2), O44:HNM (1), O64:H20 (1) <sup>c</sup> , O76:H40 (1), O86:HNM (2), O103:H10 (3), O112:HNT (1), O127:H9 (1), ONT:H2 (1), ONT:H16 (1), ONT:H21 (3), ONT:H39 (1), ONT:H51 (1), ONT:HNM (2) |
| CTX-M-32  | 2                  | O25a:HNM (1), O114:HNT (1)                                                                                                                                                                                                                             |
| SHV5/12   | 14                 | <b>O2:HNM</b> (2), O11:H4 (1) <sup>c</sup> , O16:HNM (2), O18:HNM (1), O23:H39 (1), O28:HNM (1), O64:H25 (3), O120:HNM (1), ONT:H12 (1), ONT:H42 (1)                                                                                                   |
| TEM52     | 2                  | O140:HNM (2)                                                                                                                                                                                                                                           |
| CMY2      | 10                 | <b>O2:H6</b> (4), <b>O2:H7</b> (1), O5:H11 (1), O20:HNM (1), O82:H21 (1), O109:HNM (1), O114:H4 (1)                                                                                                                                                    |

<sup>a</sup> Bold letters indicate classic human ExPEC serotypes.

<sup>b</sup> Isolates that did not react with O and H antisera were classified as nontypeable (ONT and HNT), and those that were nonmotile were denoted HNM.

<sup>c</sup> One isolate was positive for CTX-M-9 and SHV5/12, and other for CTX-M-1 and CTX-M-14.
